# Supplementary material
Source: PubMed Central journal article supplement (PMC4449819)
Supplement: NIHMS651575-supplement-supplement_1.pdf [file NIHMS651575-supplement-supplement_1.pdf]

**Supplementary Table 1. Association between baseline carbamylated albumin and risk of death from specific causes in patients stratified for major risk factors present at baseline**

| Stratification <sup>1</sup>           | 1 year            |         | 4 years          |         |
|---------------------------------------|-------------------|---------|------------------|---------|
|                                       | HR* (95% CI)      | P-value | HR (95% CI)      | P-value |
| No CHF (n=727)                        | 3.01 (1.22-7.45)  | 0.017   | 1.49 (0.97-2.31) | 0.071   |
| Preexisting CHF (n=378)               | 3.68 (1.56-8.69)  | 0.003   | 2.04 (1.28-3.25) | 0.003   |
| No Arrhythmia (n=909)                 | 3.25 (1.55-6.80)  | 0.002   | 1.72 (1.19-2.47) | 0.004   |
| Preexisting Arrhythmia (n=196)        | 4.39 (1.34-14.39) | 0.015   | 2.13 (1.11-4.09) | 0.023   |
| No CAD (n=882)                        | 3.88 (1.88-7.98)  | <0.001  | 1.82 (1.26-2.62) | 0.001   |
| Preexisting CAD (n=223)               | 3.02 (0.87-10.42) | 0.081   | 1.85 (0.97-3.53) | 0.061   |
| No Hypertension (n=133)               | 2.89 (0.44-18.89) | 0.268   | 0.90 (0.37-2.18) | 0.813   |
| Preexisting Hypertension (n=972)      | 3.86 (1.99-7.48)  | <0.001  | 2.08 (1.48-2.93) | <0.001  |
| BNP≤3361 (n=552)                      | 2.67 (0.72-9.99)  | 0.144   | 1.33 (0.78-2.26) | 0.291   |
| BNP>3361 (n=550)                      | 2.88 (1.39-5.97)  | 0.004   | 1.63 (1.09-2.44) | 0.018   |
| Troponin T ≤ 0.058 (n=565)            | 3.45 (1.19-10.01) | 0.023   | 1.84 (1.11-3.06) | 0.018   |
| Troponin T >0.058 (n=537)             | 3.25 (1.46-7.25)  | 0.004   | 1.40 (0.91-2.13) | 0.123   |
| CRP ≤ 5 (n=569)                       | 4.34 (1.59-11.85) | 0.004   | 2.06 (1.28-3.33) | 0.003   |
| CRP >5 (n=533)                        | 3.95 (1.76-8.88)  | 0.001   | 1.84 (1.20-2.83) | 0.005   |
| Age ≤ 66 (n=577)                      | 5.05 (1.84-13.90) | 0.002   | 1.77 (1.11-2.84) | 0.017   |
| Age >66 (n=528)                       | 2.87 (1.28-6.47)  | 0.011   | 1.76 (1.13-2.75) | 0.013   |
| Systolic blood pressure ≤ 141 (n=548) | 3.14 (1.43-6.91)  | 0.005   | 1.71 (1.10-2.66) | 0.016   |
| Systolic blood pressure >141 (n=557)  | 4.88 (1.77-13.40) | 0.002   | 2.03 (1.28-3.21) | 0.003   |

\*Univariate Cox proportional hazards model of association between baseline carbamylated albumin (log-transformed continuous variable) and 1-year and 4-year risks of adverse events. <sup>1</sup>Continuous variables are stratified by above vs. below median values.
